# Supplementary material for: Mutant p53 gain of function induces HER2 over-expression in cancer cells
Source: PubMed Central journal article supplement (PMC6029411; doi:10.1186/s12885-018-4613-1), 2018-07-03
Supplement: 12885_2018_4613_MOESM1_ESM.pdf [file 12885_2018_4613_MOESM1_ESM.pdf]

| <b>GENE</b> |         | <b>Primer sequence</b>           | <b>Product Size</b> |
|-------------|---------|----------------------------------|---------------------|
| <i>HER2</i> | Forward | 5' – AGCTCTGCTACCAGGACACG – 3'   | 168 bp              |
|             | Reverse | 5' – TCAGGCTCTGACAATCCTCA – 3'   |                     |
| <i>TP53</i> | Forward | 5' – GATGCTGTCCCCGGACGA – 3'     | 127 bp              |
|             | Reverse | 5' – AGGGGCCCGCCGGTGTAG – 3'     |                     |
| <i>B2M</i>  | Forward | 5' – ACCCCCCTGAAAAAGATGAGT – 3'  | 100 bp              |
|             | Reverse | 5' – ATGATGCTGCTTACATGTCTCG – 3' |                     |
