# Supplementary material for: Mutant p53 gain of function induces HER2 over-expression in cancer cells
Source: Springer Nature journal article supplement (doi:10.1186/s12885-018-4613-1), 2018-07-03
Supplement: MOESM2 [file 15904248]

| GENE         | Primer Sequence                |                                  | Product Size |
|--------------|--------------------------------|----------------------------------|--------------|
|              | Foward                         | Reverse                          |              |
| <i>HER2a</i> | 5' - GTTGCCACTCCCAGACTTGT - 3' | 5' - CTCCATGGTGCTCACTGC - 3'     | 321 bp       |
| <i>HER2b</i> | 5' - CACATCCCCCTCTTGACTA - 3'  | 5' - GCAACTCCCAGCTTCACTTT - 3'   | 331 bp       |
| <i>HER2c</i> | 5' - GGTGGCACATGCCTGTAATC - 3' | 5' - AATGGTTTTCCCACCACATC - 3'   | 329 bp       |
| <i>HER2d</i> | 5' - ATCTGCCCTGATCTGAGTTT - 3' | 5' - GCTGCTGATTCGATTTCTC - 3'    | 220 bp       |
| <i>HER2e</i> | 5' - CTCAAGCCTACTCTGAGGAA - 3' | 5' - TGGAGACTGGGGGGCACAGGA - 3'  | 302 bp       |
| <i>HER2f</i> | 5' - GCAGTAGCAAGCATCGAGTT - 3' | 5' - TGGATCATCACAAAGGTTTTCA - 3' | 202 bp       |
