# Supplementary material for: Mutant p53 gain of function induces HER2 over-expression in cancer cells
Source: Springer Nature journal article supplement (doi:10.1186/s12885-018-4613-1), 2018-07-03

**(A)**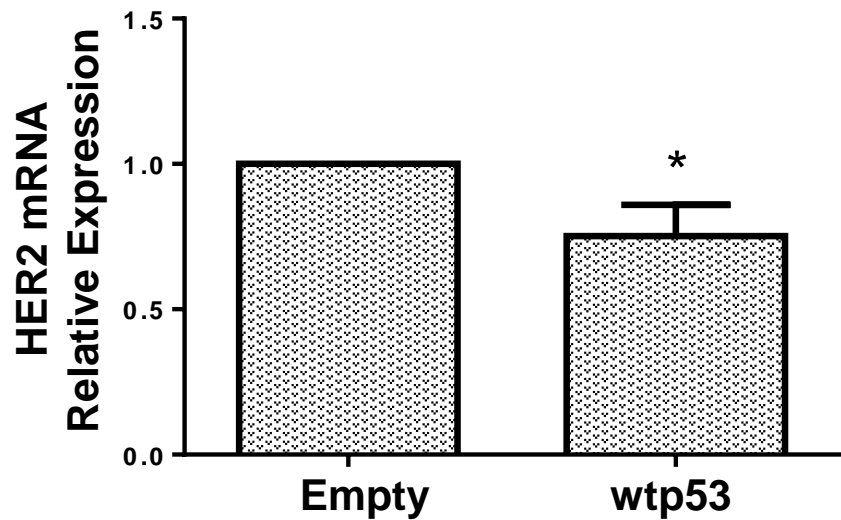**(B)**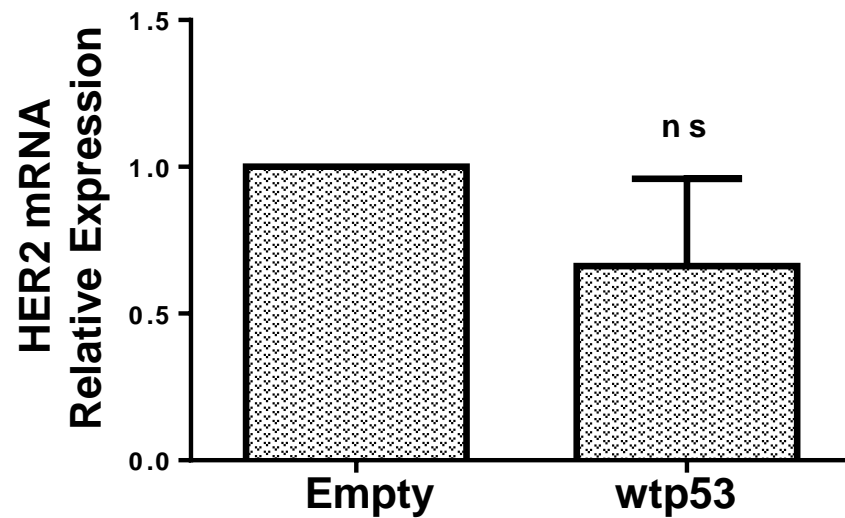**(C)**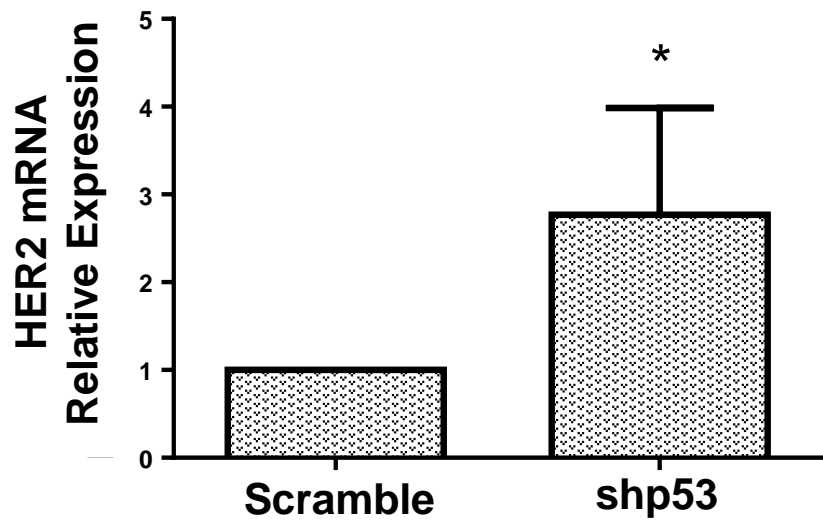**(D)**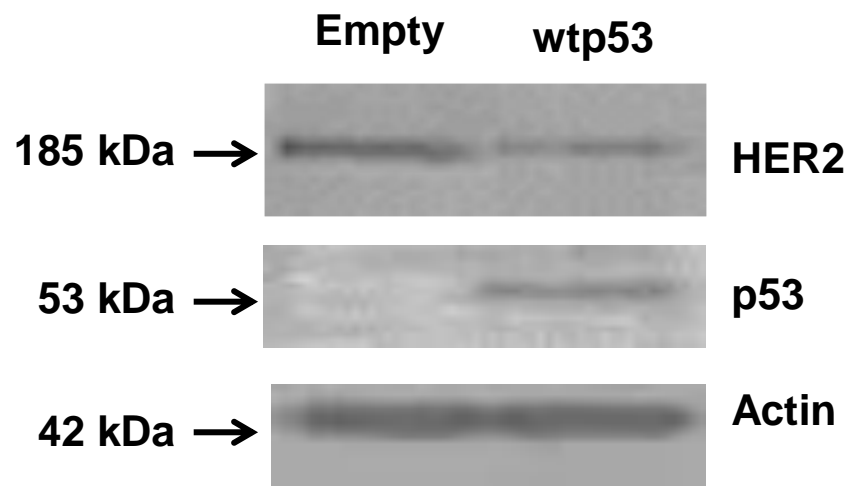

Supplement: MOESM3 [file 15904248]
